# Supplementary material for: Synthesis of novel 2,6-disubstituted-3,4-dimethylidene tetrahydropyrans via Prins-type cyclizationElectronic Supplementary Information (ESI) available: Experimental section. See http://www.rsc.org/suppdata/cc/b3/b307320c/
Source: Royal Society of Chemistry journal article supplement (doi:10.1039/b307320c), 2003-01-01
Supplement: b307320c.doc [file b307320c.doc]

Electronic Supplementary Information (ESI) service

Synthesis of Novel 2,6-Disubstituted-3,4-dimethylidene Tetrahydropyrans *via* Prins-type Cyclization

Yong Seo Cho,*Kaliyan Karupaiyan,Hyun Jung Kang, Ae Nim Pae,*Joo Hwan Cha, Hun Yeong Koh and Moon Ho Chang

**Representative Experimental Procedure for the Preparation of 2,6-*cis*-Disubstituted 3,4-Di-*exo*-methylenetetrahydropyrans(3) *via* TMSOTf Promoted Prins type cyclization of -Hydroxy Allenylsilanes.**

Preparation of tetrahydropyran **3a.** To a solutuion of a -hydroxy allenylsilane **1** (25 mg, 0.101 mmol) in diethyl ether (1.5 mL), benzaldehyde (21.5 mg, 0.202 mmol) was added, and the mixture was cooled to –78oC . TMSOTf (33.82 mg, 0.152 mmol) was added and the mixture was stirred until the completion of reaction, 5h (TLC). The diluted reaction mixture with 10 mL of diethyl ether was given water and brine washes 2 mL each successively and dried over anhydrous MgSO4. The solvent was evaporated under reduced pressure and the crude material was purified by flash column chromatography, eluting with 10% ether in hexanes to afford compound **3a** (21.27 mg, 80%) as a clear colourless oil.

(**3a**)

(**3a**), (10% Ether in Hexane); 300-MHz 1H NMR (CDCl3)  2.55-2.80 (m, 2H), 4.83 (dd, 3.78, 14.11 Hz, 1H), 4.90 (s, 1H), 5.18 (s, 1H), 5.21 (d, 5,36 Hz, 2H), 7.10-7.50 (m, 10H). 75-MHz 13C NMR (CDCl3)  43.7, 80.1, 83.0, 110.9, 111.8, 126.3, 128.0, 128.2, 128.4, 128.5, 128.8, 140.2, 142.5, 145.5, 149.0. IR (KBr) 3031, 1452, 1067 cm-1. GC MS: m/z 262 (M+). HRMS calcd for C19H18O: 262.1358. Found: 262.1373

(**3b**)

(10% Ether in Hexane); 300-MHz 1H NMR (CDCl3)  2.40-2.60 (m, 1H), 2.72 (dd, 2.79, 14.11 Hz, 1H), 3.08 (dd, 3.75, 14.11 Hz, 1H), 3.21 (dd, 4.37, 14.19 Hz, 1H), 4.30-4.42 (m, 1H), 4.55 (dd, 2.81, 11.47 Hz, 1H), 4.86 (t, 1.82 Hz, 1H), 4.98 (s, 1H), 5.18 (t, 2.04 Hz, 1H), 5.28 (s, 1H), 7.10-7.43 (m, 10H). 75-MHz 13C NMR (CDCl3)  39.7, 42.9, 78.81, 79.81, 108.8, 110.8, 125.9, 126.4, 127.6, 128.5, 130.0, 139.3, 142.6, 145.7, 148.0. IR (KBr) 2924, 1451, 1097 cm-1. GC MS: m/z 276 (M+). HRMS calcd for C20H20O: 276.1514. Found: 276.1527.

(**3c**)

(**3c**), (10% Ether in Hexane); 300-MHz 1H NMR (CDCl3)  1.06 (t, 7.36 Hz, 3H), 1.68-1.83 (m, 1H), 1.83-2.00 (m, 1H), 2.65 (dd, 2.74, 13.99 Hz, 1H), 4.81 (s, 1H), 4.86 (s, 1H), 5.13 (s, 1H), 5.21 (s, 1H), 7.17-7.40 (m, 5H). 75-MHz 13C NMR (CDCl3)  10.5, 26.0, 43.2, 79.2, 80.2, 108.1, 110.4, 126.1, 127.8, 128.7, 142.9, 146.1, 148.1. IR (KBr) 2932, 1718, 1452 cm-1. GC MS: m/z 214 (M+).HRMS calcd for C15H18O: 214.1358. Found: 214.1358.

(**3d**)

(**3d**), (10% Ether in Hexane); 300-MHz 1H NMR (CDCl3) 2.20-3.30 (m, 2H), 2.64 (dd, 4.90, 14.05 Hz, 1H), 2.80-2.95 (m, 2H), 3.10 (dd, 3.57, 13.73 Hz, 1H), 3.54-3.70 (m, 1H), 4.00-4.13 (m, 1H), 4.72 (s, 1H), 4.89 (s, 1H), 5.05 (s, 1H), 5.18 (s, 1H), 7.00-7.28 (m, 10H). 75-MHz 13C NMR (CDCl3) 39.2, 41.1, 42.7, 78.6, 79.5, 108.2, 110.6, 126.4, 128.5, 129.7, 129.8, 130.0, 139.4, 145.8, 148.5. IR (KBr) 2926, 1735, 1254 cm-1. GC MS: m/z 290 (M+). HRMS calcd for C21H22O: 290.1671. Found: 290.1671.

(**3e**)

(**3e**), (10% Ether in Hexane); 300-MHz 1H NMR (CDCl3)  0.97 (t, 7.38 Hz, 3H), 1.52-1.72 (m, 1H), 1.73-1.92 (m, 1H), 2.14-2.27 (m, 1H), 2.36 (dd, 2.67, 13.87 Hz, 1H), 2.69 (dd, 5.80, 13.73 Hz, 1H), 2.96 (dd, 7.11, 13.73 Hz, 1H), 3.60-3.75 (m, 1H), 4.68 (t, 2.00 Hz, 1H), 4.79 (s, 1H), 5.02 (t, 2.12 Hz, 1H), 5.13 (s, 1H), 7.12-7.32 (m, 5H). 75-MHz 13C NMR (CDCl3)10.6, 25.9, 41.0, 43.0, 78.5, 80.0, 107.7, 110.2, 126.6, 128.6, 129.9, 139.0, 146.1, 148.6. IR (KBr) 2931, 1718, 1259 cm-1. GC-MS: m/z 228 (M+). HRMS calcd for C16H20O: 228.1514. Found: 228.1484.

(**3f**)

(**3f**), (10% Ether in Hexane); 300-MHz 1H NMR (CDCl3)  0.91 (t, 7.32 Hz, 3H), 1.33-1.45 (m, 1H), 1.48-1.78 (m, 3H), 2.17-2.42 (m, 2H), 2.72 (dd, 5.77, 13.75 Hz, 1H), 2.98 (dd, 7.14, 13.75 Hz, 1H), 3.60-3.75 (m, 1H), 3.75-3.85 (m, 1H), 4.71 (t, 1.95 Hz, 1H), 4.82 (s, 1H), 5.05 (t, 2.11 Hz, 1H), 5.15 (s, 1H), 7.07-7.34 (m, 5H). 75-MHz 13C NMR (CDCl3) 14.4, 19.2, 34.9, 41.0, 43.0, 78.2, 78.6, 107.6, 110.1, 126.5, 128.5, 129.8, 139.0, 146.1, 148.9. IR (KBr) 2930, 1636, 1454 cm-1. GC-MS: m/z 242 (M+). HRMS calcd for C17H22O: 242.1671. Found: 242.1651

(**3g**)

(**3g**), (10% Ether in Hexane); 300-MHz 1H NMR (CDCl3)  2.16-2.40 (m, 2H), 2.74 (dd, 7.20, 13.52 Hz, 1H), 3.05 (dd, 5.57, 13.53 Hz, 1H), 3.68-3.78 (m, 1H), 4.53 (s, 1H), 4.73 (s, 1H), 5.00 (s, 1H), 5.07 (s, 1H), 5.16 (s, 1H), 6.42 (s, 1H), 7.03-7.30 (m, 5H), 7.43 (d, 6.18 Hz, 2H). 75-MHz 13C NMR (CDCl3) 40.3, 43.0, 75.3, 78.7, 110.3, 110.7, 110.9, 124.7, 126.7, 128.7, 130.0, 138.4, 141.0, 143.4, 144.9, 147.8. IR (KBr) 2930, 1640, 1500 cm-1. GC-MS: m/z 266 (M+). HRMS calcd for C18H18O2: 266.1307. Found: 266.1262.

(**3h**)

(**3h**), (10% Ether in Hexane); 300-MHz 1H NMR (CDCl3)  0.97 (t, 7.51 Hz, 3H), 1.03 (t, 7.32 Hz, 3H), 1.38-1.70 (m, 3H), 1.74-1.90 (m, 1H), 2.06-2.22 (m, 1H), 2.39 (dd, 2.41, 13.86 Hz, 1H), 3.25-3.38 (m, 1H), 3.62-3.73 (m, 1H), 4.72 (s, 1H), 4.78 (s, 1H), 5.03 (s, 1H), 5.12 (s, 1H). 75-MHz 13C NMR (CDCl3)  10.5, 10.7, 25.9, 29.6, 41.2, 79.2, 79.9, 107.4, 109.7, 146.6, 149.0. IR (KBr) 2926, 1720, 1460 cm-1. GC-MS: m/z 166 (M+). HRMS calcd for C11H18O: 166.1358. Found: 166.1372.

(**3i**)

(**3i**), (10% Ether in Hexane); 300-MHz 1H NMR (CDCl3) 2.54-2.73 (m, 2H), 4.24 (s, 4H), 4.31 (s, 1H), 4.69 (dd, 3.74, 10.34 Hz, 1H), 4.87 (s, 1H), 5.02 (s, 1H), 5.17 (s, 1H), 5.21 (s, 1H), 6.78-7.00 (m, 3H), 7.20-7.47 (m, 5H). 75-MHz 13C NMR (CDCl3)  43.7, 64.8, 80.0, 82.6, 110.8, 111.8, 117.2, 117.3, 121.6, 126.3, 128.0, 128.8, 133.7, 142.6, 143.6, 143.7, 145.5, 148.9. IR (KBr) 2934, 1592, 1507 cm-1. GC-MS: m/z 320 (M+). HRMS calcd for C21H20O3: 320.1412. Found: 320.1430.

(**3j**)

(**3j**), (10% Ether in Hexane); 300-MHz 1H NMR (CDCl3)  1.85-2.00 (m, 1H), 2.02 (s, 3H), 2.08-2.32 (m, 2H), 2.34-2.45 (m, 1H), 2.71 (dd, 5.71, 13.95 Hz, 1H), 2.94 (dd, 7.20, 13.65 Hz, 1H), 3.62-3.76 (m, 1H), 3.90-3.99 (m, 1H), 4.10-4.32 (m, 2H), 4.73 (s, 1H), 4.80 (s, 1H), 5.06 (s, 1H), 5.17 (s, 1H), 7.12-7.37 (m, 5H). 75-MHz 13C NMR (CDCl3)  21.21, 31.71, 40.65, 48.68, 61.67, 75.09, 78.45, 107.74, 110.52, 126.48, 128.45, 129.59, 138.62, 145.33, 147.82, 171.28. IR (KBr) 2930, 1737, 1369 cm-1. GC-MS: m/z 286 (M+). C18H22O3: 286.1569. Found: 286.1571.

(**3k**)

(**3k**)**,** (10% Ether in Hexane); 300-MHz 1H NMR (CDCl3) 0.83 (t, 7.2 Hz, 3H), 1.33-1.60 (m, 2H), 2.12-2.28 (m, 1H), 2.40 (dd, 2.70, 14.25 Hz, 1H), 2.93 (dd, 9.30, 14.10 Hz, 1H), 3.11 (dd, 3.90, 14.4 Hz, 1H), 3.24-3.38 (m, 1H), 4.00-4.12 (m, 1H), 4.76 (s, 1H), 4.89 (s, 1H), 5.07 (s, 1H), 5.19 (s, 1H), 7.00-7.40 (m, 5H). 75-MHz 13C NMR (CDCl3) 10.27, 29.36, 39.05, 40.99, 79.06, 79.12, 107.81, 110.06, 126.22, 128.22, 129.76, 139.41, 146.14, 148.72. IR (KBr) 2931, 1723, 1453 cm-1. GC-MS: m/z 228 (M+). HRMS calcd for C16H20O: 228.1514. Found: 228.1484.

(**3l**)

(**3l**), (10% Ether in Hexane); 300-MHz 1H NMR (CDCl3)  1.60-1.74 (m, 2H), 1.80.1.92 (m, 2H), 2.56 (s, 3H), 2.18-2.32 (m, 1H), 2.39 (dd, 2.70, 14.25 Hz, 1H), 2.72 (dd, 5.70, 13.65 Hz, 1H), 2.94 (dd, 7.20, 13.65 Hz, 1H), 3.62-3.74 (m, 1H), 3.77-3.85 (m, 1H), 4.04 (t, 5.40 Hz, 2H), 4.72 (s, 3H), 4.80 (s, 1H), 5.05 (s, 1H), 5.16 (s, 1H), 7.12-7.39 (m, 5H). 75-MHz 13C NMR (CDCl3)  21.28, 24.90, 28.96, 40.75, 42.79, 64.72, 78.48, 107.70, 110.33, 126.43, 128.41, 129.65, 138.73, 145.56, 148.23, 171.44. IR (KBr) 2942, 1735, 1360 cm-1. GC-MS: m/z 300 (M+). HRMS calcd for C19H24O3: 300.1725. Found: 300.1708.

(**3m**)

(**3m**),(10% Ether in Hexane); 300-MHz 1H NMR (CDCl3)  1.77-1.95 (m, 3H), 1.95-2.06 (m, 2H), 2.09 (s, 3H), 2.46-2.60 (m, 1H), 2.69 (dd, 2.7, 13.95 Hz, 1H), 4.06-4.24 (m, 2H), 4.60 (dd, 3.00, 11.40 Hz, 1H), 4.86 (t, 1.80 Hz, 1H), 4.91 (s, 1H), 5.18 (t, 1.80 Hz, 1H), 5.26 (s, 1H), 7.25-7.52 (m, 5H). 75-MHz 13C NMR (CDCl3)  21.32, 24.97, 29.16, 43.04, 64.90, 78.19, 79.20, 108.14, 110.61, 125.95, 127.74, 128.61, 142.47, 145.62, 147.78. IR (KBr) 2953, 1728, 1250 cm-1. GC-MS: m/z 286 (M+). HRMS calcd for C18H22O3: 286.1569. Found: 286.1618.

(**4a**)

(**4a**), (10% ethyl acetate in Hexane); 300-MHz 1H NMR (CDCl3)  1.38-1.97 (m, 8H), 2.07 (s, 3H), 2.47-2.71 (m, 4H), 4.07 (br s, 1H), 4.57 (q, 2.70, 11.1 Hz, 1H), 4.85 (d, 13.5 Hz, 2H), 5.17 (d, 25.2 Hz, 2H), 7.30-7.43 (m, 5H). 75-MHz 13C NMR (CDCl3) 4.32, 24.40, 25.08, 32.53, 43.05, 45.69, 78,50, 79.12, 80.50, 90.22, 107,99, 110.43, 125.96, 127.67, 128.58, 142.59, 145.78, 148.03, 188.67. IR (KBr) 2939, 1670, 1451 cm-1. GC-MS: m/z 308 (M+). HRMS calcd for C21H24O2: 308.1776. Found: 308.1789

(**4b**)

(**4b**), (10% ethyl acetate in Hexane); 300-MHz 1H NMR (CDCl3)  1.38-1.92 (m, 8H), 2.04 (s, 3H), 2.51-2.71 (m, 4H), 4.06 (br s, 1H), 4.57 (q, 3.0, 11.7 Hz, 1H), 4.85 (d, 16.2 Hz, 2H), 5.20 (d, 20.7 Hz, 2H), 7.30-7.43 (m, 5H). 75-MHz 13C NMR (CDCl3) 4.32, 24.30, 25.51, 29.33, 32.59, 43.05, 45.67, 79.09, 80.51, 90.15, 107,93, 110.34, 125.96, 127.65, 128.57, 142.65, 145.87, 148.17, 188.67. IR (KBr) 2935, 2216, 1670 cm-1. GC-MS: m/z 322 (M+). HRMS calcd for C22H26O2: 322.1933. Found: 322.1941

(**4c**)

(**4c**), (10% ethyl acetate in Hexane); 300-MHz 1H NMR (CDCl3)  1.45-1.1.93 (m, 8H), 2.53-2.75 (m, 4H), 4.10 (br s, 1H), 4.60 (q, 2.4, 11.1 Hz, 1H), 4.86 (d, 14.4 Hz, 2H), 5.20 (d, 20.4 Hz, 2H), 7.29-7.63 (m, 10H). 75-MHz 13C NMR (CDCl3) 24.42, 25.55, 29.38, 32.62, 43.06, 45.78, 88.15, 90.87, 107.97, 110.36, 120.33, 125.98, 127.67, 128.60, 128.90, 130.92, 133.32, 142.66, 145.87, 148.17, 188.50. IR (KBr) 2939, 2199, 1669 cm-1. GC-MS: m/z 384 (M+). HRMS calcd for C27H28O2: 384.2089 Found: 384.2082

(**4d**)

(**4d**), (10% ethyl acetate in Hexane); 300-MHz 1H NMR (CDCl3)  0.82-1.46 (m, 6H), 2.15-2.61 (m, 4H), 3.96 (br s, 1H), 4.57 (q, 2.7, 11.4 Hz, 1H), 4.79 (d, 13.0 Hz, 2H), 5.20 (d, 16.7 Hz, 1H), 6.60 (m, 1H), 7.17-7.31 (m, 5H). 75-MHz 13C NMR (CDCl3) 25.30, 28.11, 32.00, 33.71, 43.12, 79.21, 79.32, 100.20, 108,13, 110.74, 126.16, 126.18, 127.85, 128.77, 142.75, 145.87, 148.27, 155.5, 156.31. IR (KBr) 2930, 2222, 1717 cm-1. GC-MS: m/z 293 (M+). HRMS calcd for C20H23NO: 293.1780. Found: 293.1791

(**4e**)

(**4e**), (10% ethyl acetate in Hexane); 300-MHz 1H NMR (CDCl3)  1.15-2.51 (m, 10H), 3.60 (s, 3H), 3.95 (br s, 1H), 4.57 (d, 2.7 Hz, 1H), 4.68 (d, 2.7 Hz, 2H), 5.09 (d, 21.9 Hz, 2H), 5.73 (d, 14.4 Hz, 1H), 6.83-6.88 (m, 1H), 7.15-7.25 (m, 5H). 75-MHz 13C NMR (CDCl3)  IR (KBr) 2944, 1724, 1098 cm-1. GC-MS: m/z 326 (M+). HRMS calcd for C21H26O3: 326.1882. Found: 326.1875.

(**4f**)

(**4f**), (10% ethyl acetate in Hexane); 300-MHz 1H NMR (CDCl3)  1.45-2.72 (m, 12H), 3.76 (s, 3H), 4.08 (br s, 1H), 4.58 (d, 11.4 Hz, 1H), 4.92 (d, 14.1 Hz, 2H), 5.18 (d, 22.5 Hz, 2H), 5.86 (d, 14.4 Hz, 1H), 6.99-7.06 (m, 1H), 7.30-7.42 (m, 5H). 75-MHz 13C NMR (CDCl3)  IR (KBr) 2941, 1725, 1271cm-1. GC-MS: m/z 293 (M+). HRMS calcd for C22H28O3: 340.2038. Found: 340.2056.
